# Supplementary material for: ALD-grown semimetallic TiS x for hole injection into monolayer WSe 2
Source: Royal Society of Chemistry journal article supplement (doi:10.1039/d5ra06569k), 2025-01-01
Supplement: d5ra06569k1.pdf [file d5ra06569k1.pdf]

# ALD-Grown Semimetallic $\text{TiS}_x$ for Hole Injection into Monolayer $\text{WSe}_2$

*M. Saifur Rahman<sup>1, a</sup>, Chan-Wen Chiu<sup>2</sup>, and Suzanne E. Mohney<sup>1,3, a</sup>*

<sup>1</sup>*Department of Electrical Engineering, Penn State University, PA 16802, USA*

<sup>2</sup>*Department of Chemical Engineering, Penn State University, PA 16802, USA*

<sup>3</sup>*Department of Materials Science and Engineering, Penn State University, PA 16802, USA*

<sup>a</sup>Corresponding author: mqr5905@psu.edu, mohney@psu.edu

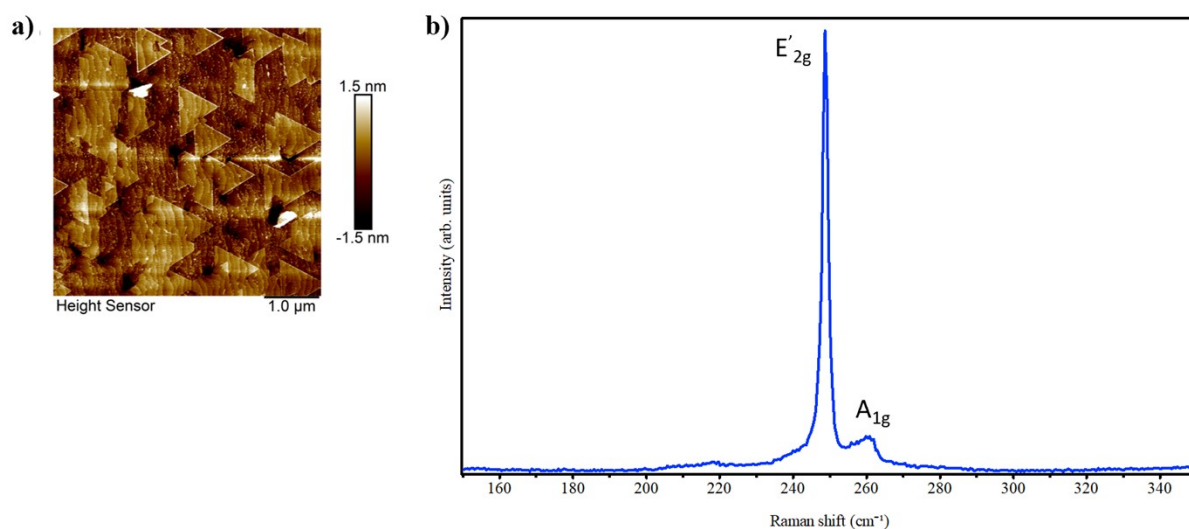

Fig. S-1: AFM image showing a monolayer of  $\text{WSe}_2$  with some bilayers (triangular shape) and (b) Raman spectrum of CVD-grown  $\text{WSe}_2$  before metallization. Consistent with primarily monolayer  $\text{WSe}_2$ , the  $\text{E}'_{2g}$  peak is near  $250\text{ cm}^{-1}$  and the  $\text{A}_{1g}$  is near  $260\text{ cm}^{-1}$ , respectively, without any peak evident from  $360\text{--}380\text{ cm}^{-1}$ .

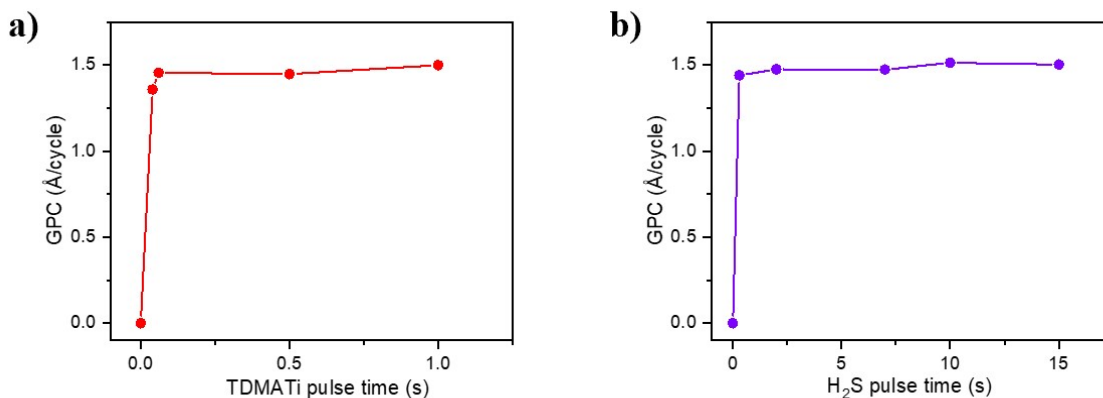

Fig. S-2: Approximate GPC from QCM saturation study for (a) the TDMATi dose with the H<sub>2</sub>S held at 10 s and (b) the H<sub>2</sub>S dose with the TDMATi dose held at 1 s.

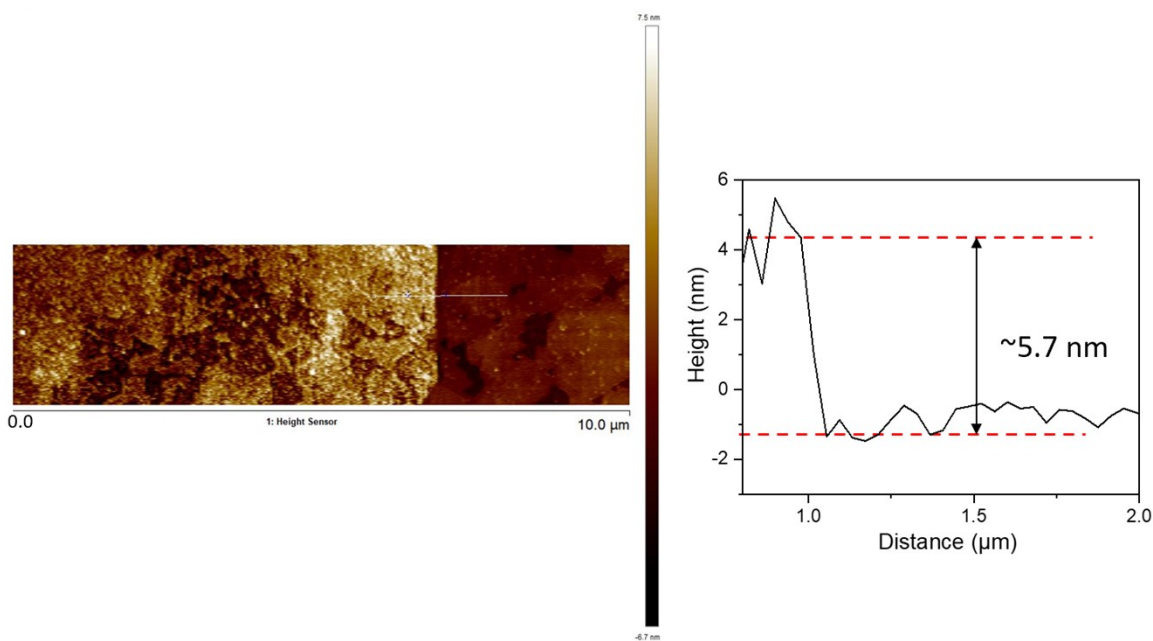

Fig. S-3: Representative AFM image of a step edge. To measure the step height, we used e-beam lithography to create a well-defined edge on the sample, performed 4–7 scans, and calculated the average step height. Some roughness of the TiS<sub>x</sub> is observed.

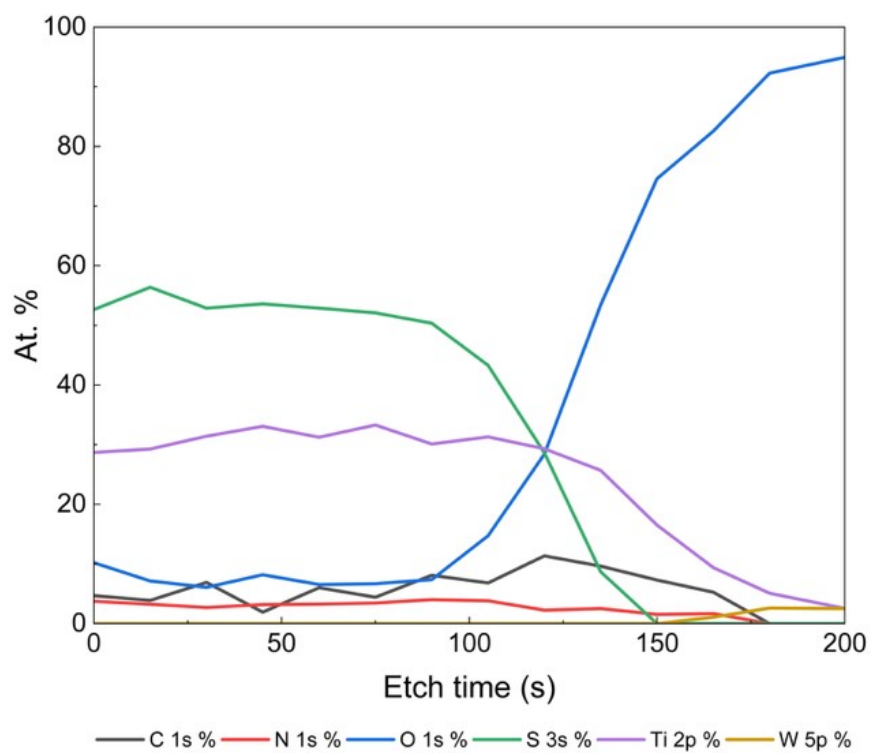

Fig. S-4: XPS depth profile of a  $\text{TiS}_x$  film deposited on  $\text{WSe}_2/\text{Al}_2\text{O}_3$  at  $100^\circ\text{C}$  by ALD. Because Al was not included in the profile, the substrate artificially appears to be 100% O.

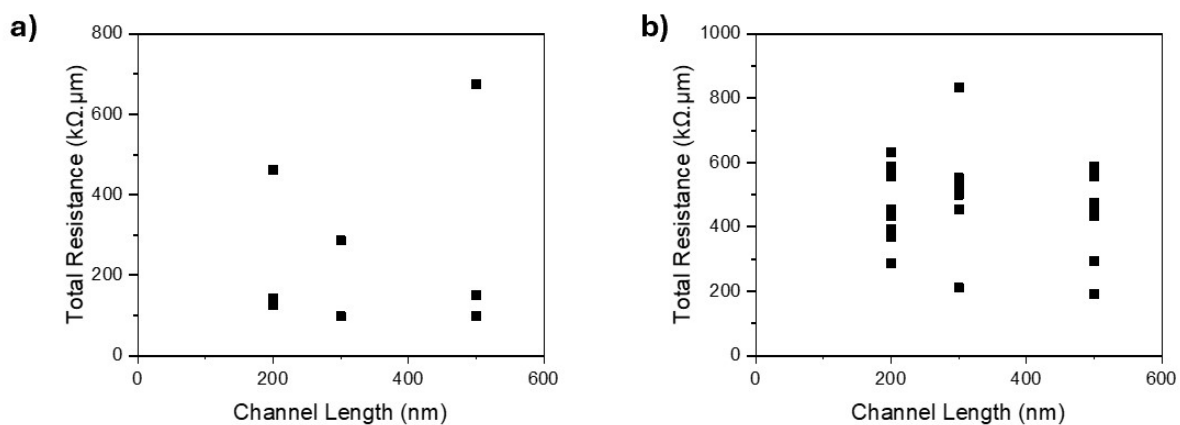

Fig. S-5: Data points from TLM structures (a) 7 nm  $\text{TiS}_x$  (b) 5 nm  $\text{TiS}_x$ .

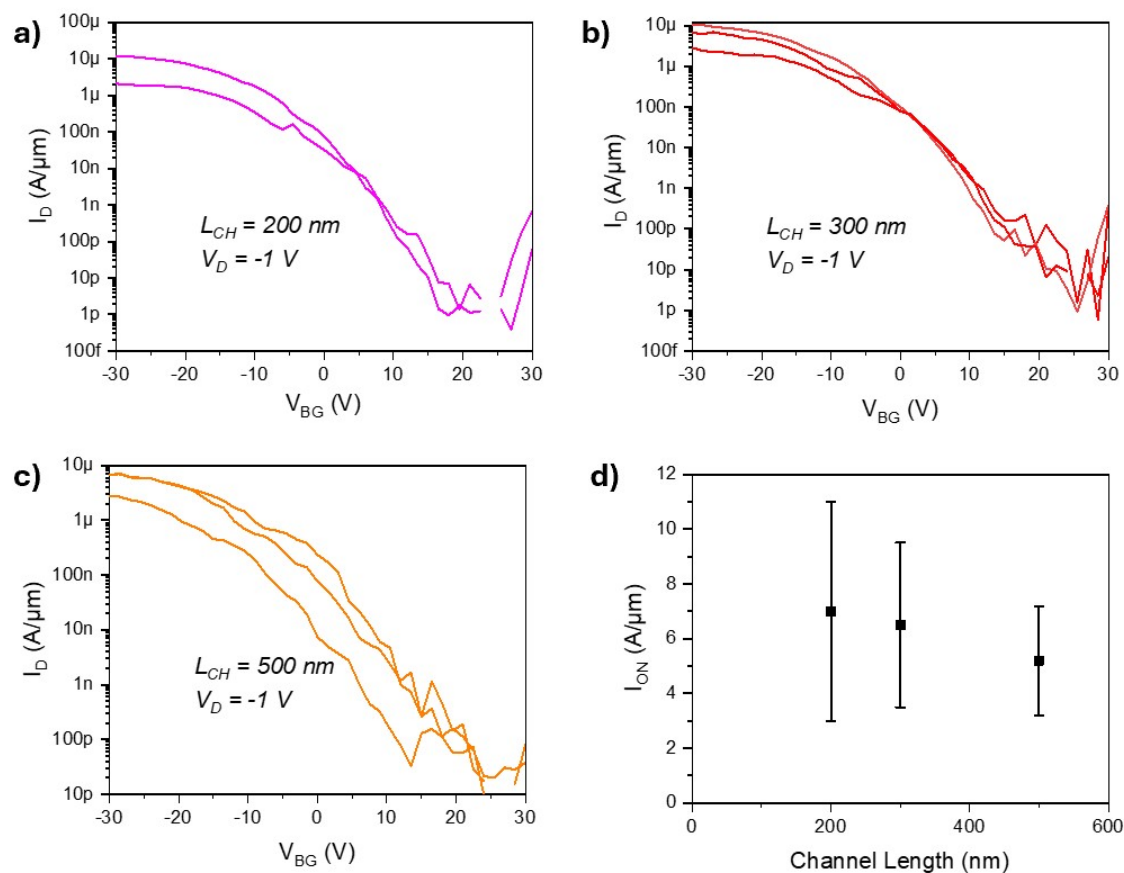

Fig. S-6: 7 nm  $\text{TiS}_x$  contacts to  $\text{WSe}_2$  on  $\text{Si}_3\text{N}_4$  substrate. Transfer characteristic with different channel lengths of (a) 200 nm, (b) 300nm, and (c) 500 nm. (d) ON current variation for different channel lengths.

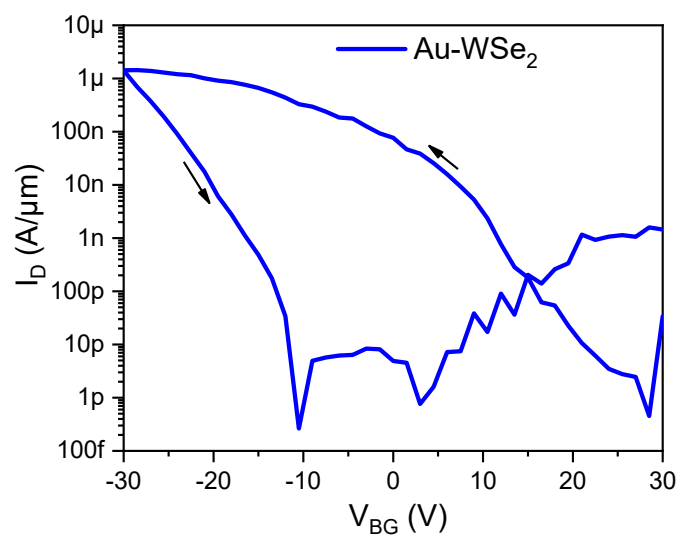

Fig. S-7: Hysteresis in devices with Au contacts for  $V_D = -1 \text{ V}$ .

Table S-1: Contact configurations and device performance

| Contact Configuration                   | Channel Length | $I_{\text{ON}}$ ( $\mu\text{A}/\mu\text{m}$ ) | $V_{\text{TH}}$ (V) | SS (V/dec) | $\mu$ ( $\text{cm}^2/\text{V.s}$ ) |
|-----------------------------------------|----------------|-----------------------------------------------|---------------------|------------|------------------------------------|
| Au/WSe <sub>2</sub>                     | 200 nm         | 1.8                                           | -3.0                | 1.4        | 0.04                               |
|                                         |                | 1.9                                           | -4.7                | 1.4        | 0.8                                |
|                                         | 300 nm         | 2.0                                           | -2.3                | 2.1        | 0.05                               |
|                                         |                | 2.0                                           | -1.9                | 1.6        | 0.6                                |
|                                         | 500 nm         | 1.5                                           | -2.2                | 1.5        | 0.4                                |
|                                         |                | 2.1                                           | -1.7                | 1.8        | 0.14                               |
| 7 nm TiS <sub>x</sub> /WSe <sub>2</sub> | 200 nm         | 5.0                                           | -0.96               | 1.6        | 1.40                               |
|                                         |                | 8.3                                           | 1.5                 | 2.0        | 0.37                               |
|                                         |                | 7.0                                           | 0.16                | 2.3        | --                                 |
|                                         | 300 nm         | 3.7                                           | -0.26               | 1.2        | 0.04                               |
|                                         |                | 10.6                                          | -3.3                | 2.0        | --                                 |
|                                         | 500 nm         | 8.0                                           | 0.05                | 1.5        | 0.95                               |
|                                         |                | 11.0                                          | 0.37                | 1.7        | 0.40                               |
|                                         |                | 1.7                                           | -2.3                | 2.2        | 0.09                               |
